# Supplementary material
Source: PubMed Central journal article supplement (PMC4627249)
Supplement: i1552-5783-56-11-6839-s01.pdf [file i1552-5783-56-11-6839-s01.pdf]

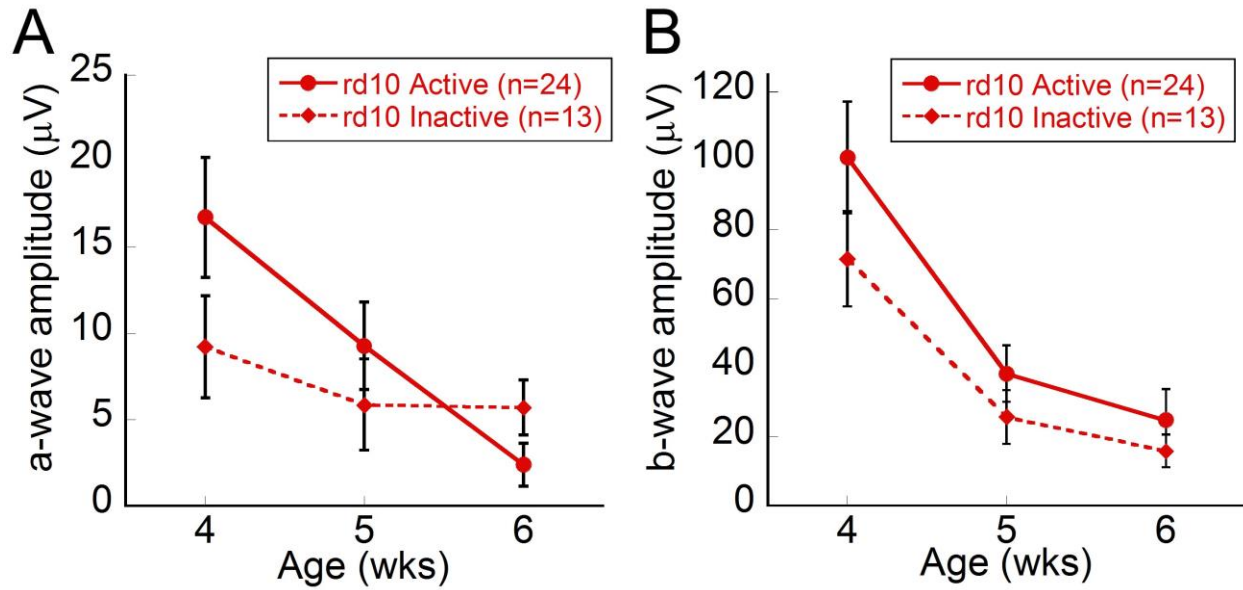

**Supplemental Figure 1.** ERG amplitudes of Active and Inactive rd10 mice. **(A)** Average a-wave amplitudes across age in response to a 2.1 log cd s/m<sup>2</sup> stimuli under dark-adapted conditions. While Active rd10 mice showed a trend for higher a-wave amplitudes at 4 weeks of age, these differences did not reach significant. **(B)** Average b-wave amplitudes in response to the same stimuli showed a trend for higher responses in the Active rd10 mice compared to Inactive rd10 mice, but did not reach statistical significance.
